1 **Nicotinate degradation in a microbial eukaryote: a novel, complete pathway extant in**  
2 ***Aspergillus nidulans*.**

3

4 Eszter Bokor<sup>1</sup>, Judit Ámon<sup>1</sup>, Mónika Varga<sup>1</sup>, András Szekeres<sup>1</sup>, Zsófia Hegedűs<sup>1</sup>, Tamás  
5 Jakusch<sup>2</sup>, Michel Flipphi<sup>3</sup>, Csaba Vágvölgyi<sup>1</sup>, Attila Gácsér<sup>4,5</sup>, Claudio Scazzocchio<sup>6\*</sup> and  
6 Zsuzsanna Hamari<sup>1\*</sup>

7

8 <sup>1</sup>University of Szeged Faculty of Science and Informatics, Department of Microbiology,  
9 Szeged, Hungary

10 <sup>2</sup>University of Szeged Faculty of Science and Informatics, Department of Inorganic and  
11 Analytical Chemistry, Szeged, Hungary

12 <sup>3</sup>Institute de Génétique et Microbiologie, Université Paris-Sud, Orsay, France

13 <sup>4</sup>HCEMM-USZ Fungal Pathogens Research Group, University of Szeged Faculty of Science  
14 and Informatics, Department of Microbiology, Szeged, Hungary

15 <sup>5</sup>MTA-SZTE “Lendület” Mycobioime Research Group, University of Szeged, Szeged,  
16 Hungary

17 <sup>6</sup>Department of Microbiology, Imperial College, London, United Kingdom and Institute for  
18 Integrative Biology of the Cell (I2BC), Gif-sur-Yvette, France

19

20 Present address of M.F.: Department of Biochemical Engineering, Faculty of Science and  
21 Technology, University of Debrecen, Debrecen, Hungary

22

23 \* Corresponding authors:

24 hamari@bio.u-szeged.hu,

25 c.scazzocchio@imperial.ac.uk

26

27 **Abstract**

28 Several strikingly different aerobic and anaerobic pathways of nicotinate utilization had been  
29 described in bacteria. No similar work is extant in any eukaryote. Here we elucidate a  
30 complete eukaryotic nicotinate utilization pathway, by constructing single or multiple gene  
31 deleted strains and identifying metabolic intermediates by ultra-high performance liquid  
32 chromatography – high-resolution mass spectrometry. Enzymes catalyzing each step and all  
33 intermediate metabolites were identified. We previously established that the cognate eleven  
34 genes organized in three clusters constitute a regulon, strictly dependent on HxnR, a pathway-  
35 specific transcription factor. The first step, hydroxylation of nicotinic acid to 6-  
36 hydroxynicotinic acid is analogous to that occurring in bacterial pathways and is catalyzed by  
37 an independently evolved molybdenum-containing hydroxylase. The following enzymatic  
38 steps have no prokaryotic equivalents: 6-hydroxynicotinic acid is converted to 2,3,6-  
39 trihydroxypyridine through 2,5-dihydroxypyridine and the trihydroxylated pyridine ring is  
40 then saturated to 5,6-dihydroxypiperidine-2-one followed by the oxidation of the C6 hydroxyl  
41 group resulting in 3-hydroxypiperidine-2,6-dione. The latter two heterocyclic compounds are  
42 newly identified cellular metabolites, while 5,6-dihydroxypiperidine-2-one is a completely  
43 new chemical compound. Ring opening between C and N results in  $\alpha$ -hydroxyglutaramate, an  
44 unprecedented compound in prokaryotic nicotinate catabolic routes. The pathway extant in *A.*  
45 *nidulans*, and in many other ascomycetes, is different from any other previously analyzed in  
46 bacteria. Our earlier phylogenetic analysis of Hxn proteins together with the complete novel  
47 biochemical pathway we now describe further illustrates the convergent evolution of catabolic  
48 pathways between fungi and bacteria.

49

50 **Significance Statement**

51 This eukaryotic nicotinate catabolic pathway illustrates the convergent evolution of  
52 prokaryotic and microbial eukaryotic metabolism. It brings to light newly identified  
53 metabolites and step processing enzymes. The identification of hitherto undescribed  
54 metabolites - which could serve as precursor biosynthetic molecules - is potentially relevant to  
55 both pharmaceutical and agrochemical industries.  
56

57 **Introduction**

58 Nicotinic acid (niacin, vitamin B3), a precursor of NAD, can serve as a nitrogen and carbon  
59 source in bacteria. In prokaryotes nicotinic acid (NA) is first converted to 6-hydroxynicotinic  
60 acid (6-NA), a reaction catalyzed by MOCO (molybdenum cofactor)-containing nicotinate  
61 hydroxylase enzymes (reviewed in (1)), which evolved several times independently (2-4).  
62 Four quite different pathways have been described in detail in bacteria (5).  
63 The only detailed study of nicotinate utilization in a eukaryotic microorganism was carried  
64 out by us in the ascomycete *Aspergillus nidulans*. A nicotinate hydroxylase was characterized,  
65 and mutants in a gene encoding this enzyme and a putative transcription factor necessary for  
66 its induction were described (6-10). The genes encoding nicotinate hydroxylase (HxnS) and  
67 the HxnR transcription factor map in a six-gene co-regulated cluster (including also *hxnZ, Y, P*  
68 and *T*, cluster *hxn1/VI*) (10). Recently, five additional *hxn* genes (*hxnX, W, V, N* and *M*) were  
69 identified as members of the HxnR-regulon. In *A. nidulans*, these map in two additional gene  
70 clusters (*hxn2/VI* and *hxn3/I* clusters) (11) (Fig. 1).

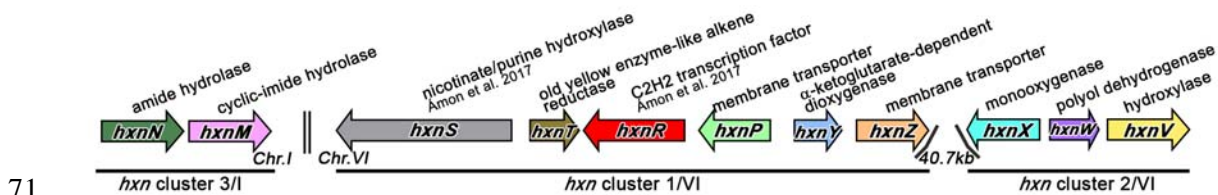

72 **Fig. 1. Organization of HxnR regulon in three gene clusters in *A. nidulans* (11).**

73 Color arrows indicate specific *hxn* genes and relative gene orientation. Double vertical line  
74 symbolizes location of genes on different chromosomes. Above the coding genes, reported  
75 roles of gene products or roles deduced from domain functions are indicated.  
76

77 All the *hxn* genes are induced by a hitherto non-determined derivative of nicotinic acid  
78 (further referred as physiological inducer) (10). Induction necessitates both the pathway-  
79 specific transcription factor HxnR and the GATA factor AreA, mediating nitrogen metabolite  
80 de-repression (10, 11). The *hxnR* gene is characterized by both loss of function (including  
81 deletions) and constitutive mutants (10).

82 In *Aspergillus terreus*, an RNASeq study determined that growth in the presence of salicylate  
83 results in induction of *hxnS* and *hxnX* orthologues through 3-hydroxyanthranilate-coupled  
84 quinolinate degradation (12). This suggests that in this organism, either a common inducer  
85 metabolite occurs in the nicotinate and salicylate degradation pathways, or that in the latter  
86 pathway a different metabolite can act as a positive effector of HxnR, too.

87 In this work, we establish the complete nicotinate degradation pathway in the ascomycete  
88 filamentous fungus *A. nidulans* by using reverse genetics and by ultra-high performance  
89 liquid chromatography – high-resolution mass spectrometry (UHPLC-HRMS) based analysis  
90 of pathway metabolites, followed by purification and NMR analysis of two compounds. This  
91 work illustrates the convergent evolution of metabolic pathways in phylogenetically very  
92 distant microorganisms.

93

## 94 Results

95 Fig. 2 shows the pathway of NA utilization in *Aspergillus nidulans*. The rationale for this  
96 pathway is detailed below.

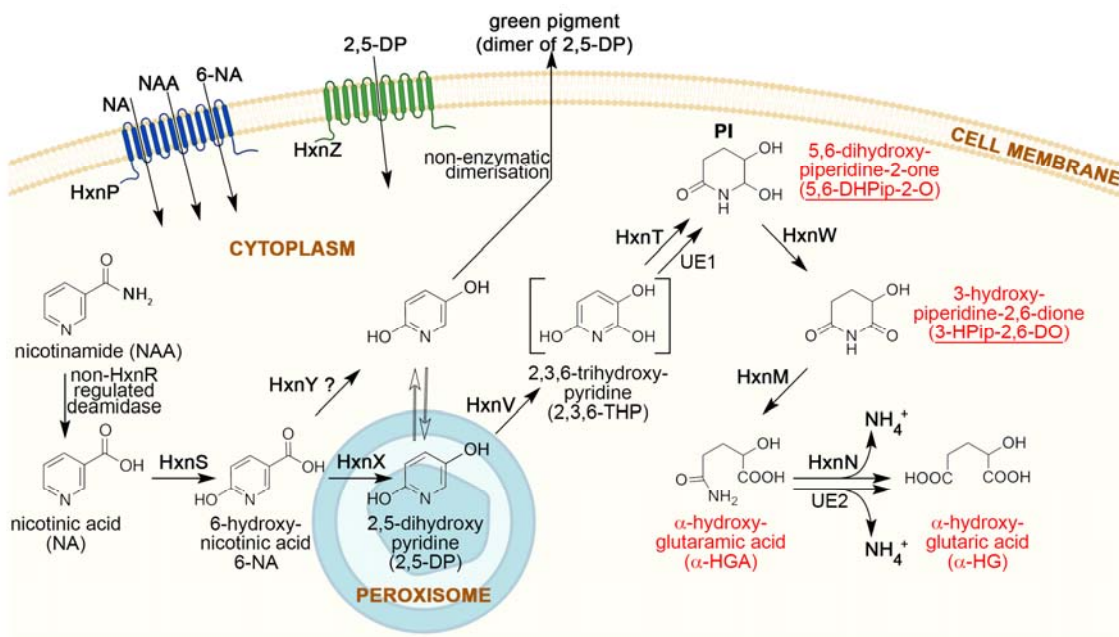

97

98

99 **Fig. 2: Nicotinate catabolic route in *A. nidulans*.** HxnP and HxnZ are transporters (marked  
100 with blue and green transmembrane domains, respectively) that transport the indicated  
101 compounds. HxnS hydroxylates nicotinic acid (NA) to 6-hydroxynicotinic acid (6-NA).  
102 HxnX operates in peroxisomes and converts 6-NA to 2,5-dihydroxypyridine (2,5-DP), which  
103 is subsequently hydroxylated by HxnV to 2,3,6-trihydroxypyridine (2,3,6-THP). HxnT and a  
104 yet-unknown alkene reductase (UE1) partially saturate the pyridine ring of 2,3,6-THP to 5,6-  
105 dihydroxypiperidine-2-one (5,6-DHPip-2-O), which is then converted to 3-hydroxypiperidine-  
106 2,6-dione (3-HPip-2,6-DO) by HxnW, a NAD-dependent polyol dehydrogenase type enzyme.  
107 The ring of 3-HPip-2,6-DO is opened by the cyclic imidase HxnM between N-C2 resulting in  
108  $\alpha$ -hydroxyglutaramate ( $\alpha$ -HGA) formation. The nitrogen is salvaged by HxnN amide  
109 hydrolase and results in  $\alpha$ -hydroxyglutarate ( $\alpha$ -HG) formation. This reaction can also be  
110 catalyzed by other amide hydrolases (UE2). NA can be formed endogenously by the  
111 hydrolytic cleavage of amide group of nicotinamide (NAA) by a non-HxnR regulated  
112 deamidase. Cellular components as cell membrane, cytoplasm and peroxisome are shown and  
113 indicated by pictograms. Reaction in the peroxisome pictogram indicates the spatial  
114 separation of the referred catabolic step in the peroxisomes. Compound in square brackets  
115 mark a supposed intermediate that was not detected by UHPLC-HRMS method but deduced  
116 by the identified upstream and downstream metabolites. Enzyme with question mark (HxnY)  
117 supposedly works on the indicated step according to UHPLC-HRMS detected decrease of the  
118 amount of 2,5-DP and its oligomer derivatives in *hxnR<sup>c7</sup> hxnV $\Delta$  hxnY $\Delta$*  strain. UE:  
119 unidentified enzyme. PI: physiological metabolite inducer of the pathway related *hxn* genes;  
120 Compounds in red letters are completely new metabolites, which have never been detected  
121 before neither in eukaryotic nor in prokaryotic organisms. (Created with BioRender.com)  
122

123 We systematically deleted all *hxn* genes (*hxnS* and *hxnR* deletions were published previously  
124 (10)) in both *hxnR<sup>+</sup>* (wild type) and *hxnR<sup>c7</sup>* (where the HxnR transcription factor is  
125 constitutively active) backgrounds. The resulting strains were tested for the utilization of the  
126 commercially available NA derivatives as N-sources or as inducer precursors (Fig. 3A).  
127 Catabolism of 6-NA in these strains was tracked by UHPLC-HRMS followed by the  
128 identification of the chemical structure of two purified metabolites by NMR (Fig. 4A, *SI*  
129 *Appendix* Tables S1 and S2).

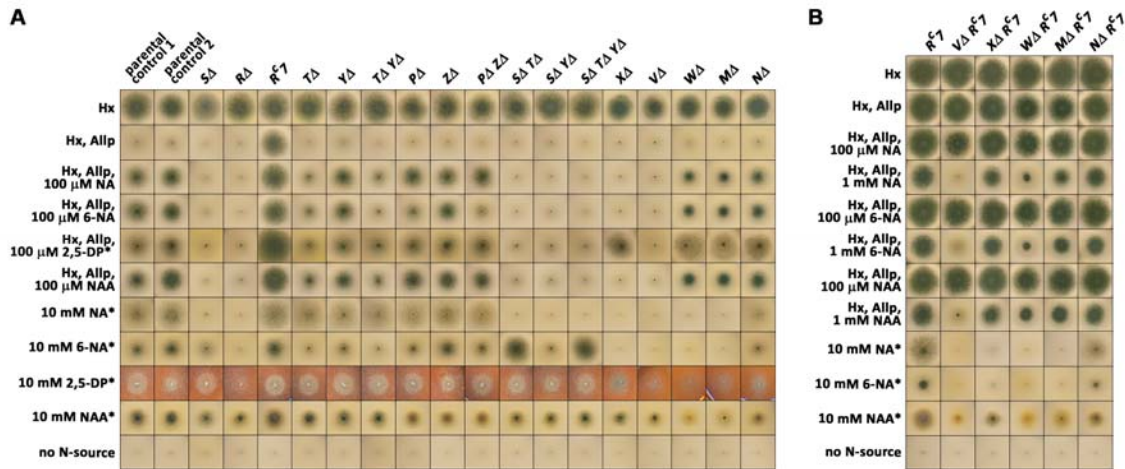

130

131 **Fig. 3. Utilization, inducer and inhibition tests of *hxn* mutants**

132 (A) Utilization of different nitrogen sources by mutants described in this article in a *hxnR*<sup>+</sup>  
 133 wild type background (except for *hxnRΔ* and *hxnR<sup>c7</sup>* controls). (B) Utilization of different  
 134 nitrogen sources by some *hxn* gene deletion mutants in an *hxnR<sup>c7</sup>* (constitutive) background.  
 135 Above each column we indicate the relevant mutation carried by each tested strain. Hx  
 136 indicates 1 mM hypoxanthine as the sole nitrogen source. Hx, Allp, as above including 5.5  
 137 mM allopurinol, which fully inhibits HxA but not HxnS (therefore Hx utilization depends on  
 138 the activation of HxnR-regulon-belonging HxnS (for details see (10)). NA and 6-NA indicate,  
 139 respectively, nicotinic acid and 6-OH nicotinic acid added as the sodium salts (see Materials  
 140 and Methods section). 2,5-DP and NAA indicate, 2,5-dihydroxypyridine and nicotinamide,  
 141 respectively. Other relevant concentrations are indicated in the figure. Plates were incubated  
 142 for 3 days at 37 °C except those marked by asterisk (\*), which were incubated for 4 days. The  
 143 relevant *hxn* genes are symbolized by only the capital letter indicating the locus name. Strains  
 144 used: parental control 1 (HZS.120, parent of *SΔ*, *TΔ*, *YΔ*), parental control 2 (TN02 A21,  
 145 parent of *RΔ*, *PΔ*, *ZΔ*, *XΔ*, *VΔ*, *NΔ*) are wild type for all *hxn* genes. Mutant strains: *SΔ*  
 146 (HZS.599), *RΔ* (HZS.614), *R<sup>c7</sup>* (FGSC A872), *TΔ* (HZS.222), *YΔ* (HZS.223), *TΔ YΔ*  
 147 (HZS.502), *PΔ* (HZS.221), *ZΔ* (HZS.226), *PΔ ZΔ* (HZS.480), *SΔ TΔ* (HZS.892), *SΔ YΔ*  
 148 (HZS.558), *SΔ TΔ YΔ* (HZS.569), *VΔ* (HZS.294), *XΔ* (HZS.726), *WΔ* (HZS.393), *MΔ*  
 149 (HZS.293), *NΔ* (HZS.288), *VΔ R<sup>c7</sup>* (HZS.309), *XΔ R<sup>c7</sup>* (HZS.310), *WΔ R<sup>c7</sup>* (HZS.517), *MΔ*  
 150 *R<sup>c7</sup>* (HZS.308) and *NΔ R<sup>c7</sup>* (HZS.306). The complete genotypes are given in the *SI Appendix*  
 151 Table S3.

152

153 These growth tests indicate whether the tested metabolites are a nitrogen source for each  
 154 strain, but also, whether in a given deletion strain the hitherto unidentified physiological  
 155 inducer metabolite is synthesized or not (Fig 3A). To this latter end we monitor induction of  
 156 *hxnS*. HxnS can catalyze the hydroxylation of hypoxanthine (Hx) to xanthine, and differently  
 157 from the canonical xanthine dehydrogenase (HxA) is resistant to allopurinol (Allp) inhibition  
 158 (13). Thus, if the physiological inducer metabolite is produced, a given strain would utilize

159 Hx as a nitrogen source in the presence of Allp (Fig. 3A). This growth on Hx may be  
160 diminished or abolished if the accumulated pathway metabolite is toxic (Figs. 3A and 3B).

161

## 162 **Transporters**

163 Two genes, *hxnP* and *hxnZ* map in cluster 1/VI and encode putative transporters of the Major  
164 Facilitator Superfamily with 12-transmembrane domains (*Sl Appendix* Figs. S1A and S1C)  
165 (11). The nearest characterized homolog of HxnP is the high-affinity nicotinate transporter  
166 TNA1 of *S. cerevisiae* (27% identity), while there is no close characterized homolog of HxnZ.  
167 Interestingly, the most likely orthologue of TNA1 in *A. nidulans* (encoded by AN5650 and  
168 sharing 31% amino acid (AA) identity with TNA1) and also its apparent paralogue in the  
169 genome (AN11116) show higher similarity with TNA1 than HxnP. While expression of  
170 AN5650 is completely independent from HxnR and NA or 6-NA induction (*Sl Appendix*  
171 S1B), *hxnP* shows a pattern of regulation identical to that of *hxnS* and the other enzyme-  
172 encoding genes of the clusters (10). This may signify a divergence in substrate specificity  
173 and/or a redundancy of nicotinate transporters.

174 Deletion of *hxnZ* impairs, but not abolishes the growth on 2,5-dihydroxypyridine (2,5-DP)  
175 and nicotinamide (NAA) as a nitrogen source and did not result in any visible impairment of  
176 growth on either NA or 6-NA (Fig. 3A). Deletion of *hxnP* affects very slightly the utilization  
177 of NA as nitrogen source, but clearly that of 6-NA and NAA (Fig. 3A). The inducer test on Hx  
178 N-source supplemented with Allp and an inducer precursor showed that a deletion of *hxnZ*  
179 slightly affects growth, while deletion of *hxnP* clearly affects the uptake of 6-NA compared to  
180 their parental control (control 2 on Fig. 3A). The phenotype of *hxnP* $\Delta$  *hxnZ* $\Delta$  double mutants  
181 is identical to that of the *hxnP* single mutant (Fig. 3A). Deletion of either *hxnP* or *hxnZ* does  
182 not affect the nicotinate supplementation of *nicB8* auxotrophy, which can be achieved at  
183 much lower concentrations of NA (as low as 1  $\mu$ M) than that those necessary for its utilization



184 as a sole nitrogen source (10 mM) or as inducer precursor of *hxn* genes (100 μM). This is  
185 consistent with a redundancy of NA transporters in the genome and with HxnP encoding a  
186 low-affinity transporter for 6-NA, NAA and NA (Fig. 2).

187

### 188 **Nicotinamide utilization**

189 One mole of N can be obtained by deamination of NAA through the action of a NAA  
190 deaminase, similar to Pnc1p in *S. cerevisiae* (14), independently from further catabolism of  
191 NA (see the growth of *hxnRΔ* and *hxnSΔ* in Fig. 3A). The putative NAA deaminase of *A.*  
192 *nidulans* encoded on Chromosome II (AN3809) is well expressed under conditions where the  
193 genes of the HxnR regulon are not expressed at all (RNA seq experiments by (15)), thus the  
194 expression of this gene must be independent of NA induction and HxnR function. The  
195 impaired utilization of NAA by *hxnWΔ*, *hxnMΔ* and *hxnNΔ* strains compared to *hxnRΔ*, where  
196 no *hxn* gene is expressed, is a diagnostic test of the toxicity of accumulated metabolic  
197 intermediates (Figs. 3A and 3B).

198

### 199 **Conversion of 6-NA to 2,5-DP occurs in the peroxisome by the 6-NA monooxygenase**

#### 200 **HxnX**

201 Previous work has shown that HxnS catalyzes the hydroxylation of NA to 6-NA ((10) and  
202 references therein). Deletion of *hxnX* prevents the utilization of 6-NA but not 2,5-DP as a  
203 nitrogen source (Fig. 3A). Strains deleted for this gene are also defective in the induction of  
204 *hxnS* by 6-NA but not by 2,5-DP and an *hxnX* deletion blocks the 2,5-DP accumulation in  
205 *hxnR<sup>c7</sup> hxnVΔ* mutant (Figs. 3A, 4A and 4B).

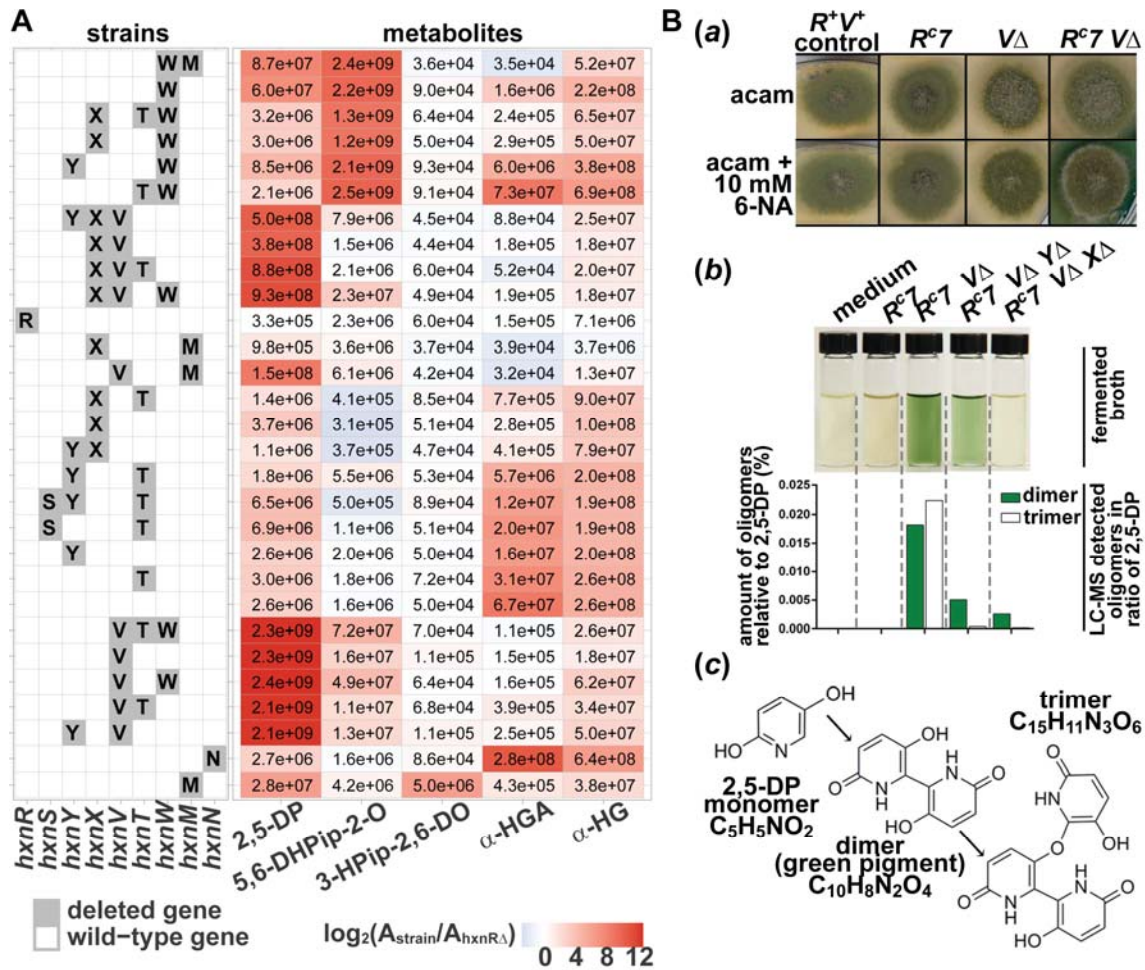

206

207 **Fig. 4: Accumulation of metabolites in various single and multiple *hxn* gene deletion**  
 208 **mutants in a constitutive *hxnR<sup>c7</sup>* background**

209 (A) Heat map of selected metabolites in control strains and NA catabolism impaired single  
 210 and multi-deletion strains. The table to the left of this panel indicates the genotype of the used  
 211 strains by a single letter code for each of the deleted *hxn* genes. The row, where no *hxn* gene  
 212 deletion is indicated refers to the *hxnR<sup>c7</sup>* control strain. The table to the right of Panel A  
 213 shows the heat map of UHPLC-HRMS measured metabolites for each strain. Numbers within  
 214 the cells correspond to raw peak area values, whereas the heat map colors correspond to  $\log_2$   
 215 fold change of peak area values relative to that of the transcription factor-deleted strain  
 216 (*hxnR $\Delta$* ) (*SI Appendix* Table S1). The data shown was obtained from mycelial extracts, except  
 217 that 3-HPip-2,6-DO compound was detected and measured exclusively in the culture broth.  
 218 Abbreviated compounds 2,5-DP: 2,5-dihydroxypyridine, 5,6-DHPip-2-O: 5,6-  
 219 dihydroxypiperidine-2-one, 3-HPip-2,6-DO: 3-hydroxypiperidine-2,6-dione,  $\alpha$ -HGA:  $\alpha$ -  
 220 hydroxyglutaramate,  $\alpha$ -HG:  $\alpha$ -hydroxyglutarate. Strains used (the relevant *hxn* genes are  
 221 symbolized by only the capital letter indicating the locus name): V $\Delta$  M $\Delta$  (H.ZS.588), V $\Delta$  R<sup>c7</sup>  
 222 (H.ZS.517), X $\Delta$  T $\Delta$  V $\Delta$  R<sup>c7</sup> (H.ZS.904), X $\Delta$  V $\Delta$  R<sup>c7</sup> (H.ZS.751), Y $\Delta$  V $\Delta$  R<sup>c7</sup> (H.ZS.898), T $\Delta$  V $\Delta$   
 223 R<sup>c7</sup> (H.ZS.894), Y $\Delta$  X $\Delta$  V $\Delta$  R<sup>c7</sup> (H.ZS.901), X $\Delta$  V $\Delta$  R<sup>c7</sup> (H.ZS.783), X $\Delta$  V $\Delta$  T $\Delta$  R<sup>c7</sup> (H.ZS.899),  
 224 X $\Delta$  V $\Delta$  V $\Delta$  R<sup>c7</sup> (H.ZS.750), R $\Delta$  (H.ZS.614), X $\Delta$  M $\Delta$  (H.ZS.582), V $\Delta$  M $\Delta$  (H.ZS.584), X $\Delta$  T $\Delta$  R<sup>c7</sup>  
 225 (H.ZS.798), X $\Delta$  R<sup>c7</sup> (H.ZS.812), Y $\Delta$  X $\Delta$  R<sup>c7</sup> (H.ZS.810), Y $\Delta$  T $\Delta$  R<sup>c7</sup> (H.ZS.903), S $\Delta$  T $\Delta$  Y $\Delta$  R<sup>c7</sup>  
 226 (H.ZS.912), S $\Delta$  T $\Delta$  R<sup>c7</sup> (H.ZS.911), Y $\Delta$  R<sup>c7</sup> (H.ZS.429), T $\Delta$  R<sup>c7</sup> (H.ZS.427), R<sup>c7</sup> (FGSCA872), V $\Delta$   
 227 T $\Delta$  V $\Delta$  R<sup>c7</sup> (H.ZS.902), V $\Delta$  R<sup>c7</sup> (H.ZS.309), V $\Delta$  V $\Delta$  R<sup>c7</sup> (H.ZS.749), V $\Delta$  T $\Delta$  R<sup>c7</sup> (H.ZS.748), Y $\Delta$

228  $V\Delta R^c7$  (HZS.747),  $N\Delta R^c7$  (HZS.306),  $M\Delta R^c7$  (HZS.308). The complete genotypes are given  
229 in the *SI Appendix* Table S3.

230 (B) Green pigment formation from 2,5-DP in a  $hxnR^c7 hxnV\Delta$  strain. *B(a)*: Pigment formation  
231 in solid medium. Strains were grown on MM with 10 mM acetamide (acam) as sole N-source  
232 without or with addition of 10 mM 6-NA (as the sodium salt). Strains used in this experiment:  
233  $R^+ V^+$ :  $hxnR^+ hxnV^+$  control (HZS.120);  $R^c7$ :  $hxnR^c7$  (FGSC A872);  $V\Delta$ :  $hxnV\Delta$  (HZS.294);  
234  $R^c7 V\Delta$ :  $hxnR^c7 hxnV\Delta$  (HZS.309). The complete genotypes are given in the *SI Appendix*  
235 Table S3. *B(b)*: Pigment formation in culture broth of each tested strain, compared with sterile  
236 medium. Underneath, the UHPLC-HRMS measured amounts of the dimer (green pigment)  
237 and trimer forms of 2,5-DP in the corresponding broths relative to the amount of 2,5-DP (%)  
238 are shown. Strains were grown in MM with 10 mM acetamide as sole N-source for 14 h and  
239 the mycelia were then transferred to MM without acetamide but supplemented with 10 mM 6-  
240 NA (as the sodium salt) substrate and further incubated for 24 h. Color of filtered ferment  
241 broths were photographed and subsequently analyzed by UHPLC-HRMS (see Materials and  
242 methods). Strains used in this experiment:  $R^c7$  and  $R^c7 V\Delta$  are the same as in panel *B(a)*;  $R^c7$   
243  $V\Delta Y\Delta$ :  $hxnR^c7 hxnV\Delta hxnY\Delta$  (HZS.747) and  $R^c7 V\Delta X\Delta$ :  $hxnR^c7 hxnV\Delta hxnX\Delta$  (HZS.783).  
244 *B(c)*: Deletion of  $hxnV$  results in the accumulation of 2,5-DP, which is non-enzymatically  
245 transformed into dimer and trimer forms. UHPLC-HRMS results for 2,5-DP are detailed in  
246 panel (A). Retention times of dimer and trimer forms were 1.58 and 5.63 min, and the  
247 accurate masses of precursor ions  $[M+H]^+$  were 221.0556 and 330.0738, respectively.  
248

249 HxnX is a monooxygenase (Fig. 5A). Its closest known structural homolog is the 6-NA 3-  
250 monooxygenase, NicC (PDB code: 5eow), from *Pseudomonas putida* KT2440 (16) (Fig. 5A).  
251 His232 and Tyr236 residues of HxnX and their spatial orientation correspond to the 6-NA  
252 substrate binding His211 and Tyr215 residues of NicC from *P. putida* KT2440 (16) (Fig. 5A).  
253 The six additional AA residues, His47, Cys202, Met213, Val227, Thr228 and Gly229, which  
254 are involved in the formation of the active site (16) are not conserved in HxnX (Gln59,  
255 Val223, Val234, Val247, Leu248 and Leu249, respectively) (Fig. 5A). Similarly to NicC (2,  
256 17), HxnX is proposed to require NADH, FAD and  $O_2$  to replace the carboxyl group with a  
257 hydroxyl group on the 6-NA substrate that results in 2,5-DP formation. HxnX includes a  
258 canonical PTS-1 peroxisome targeting signal (SRL) at its C-terminal end (*SI Appendix* Fig.  
259 S2). An N-terminal Gfp-HxnX fusion fully complements the growth phenotype of  $hxnX\Delta$  and  
260 co-localizes with a peroxisomal marker (Fig. 5E).

261

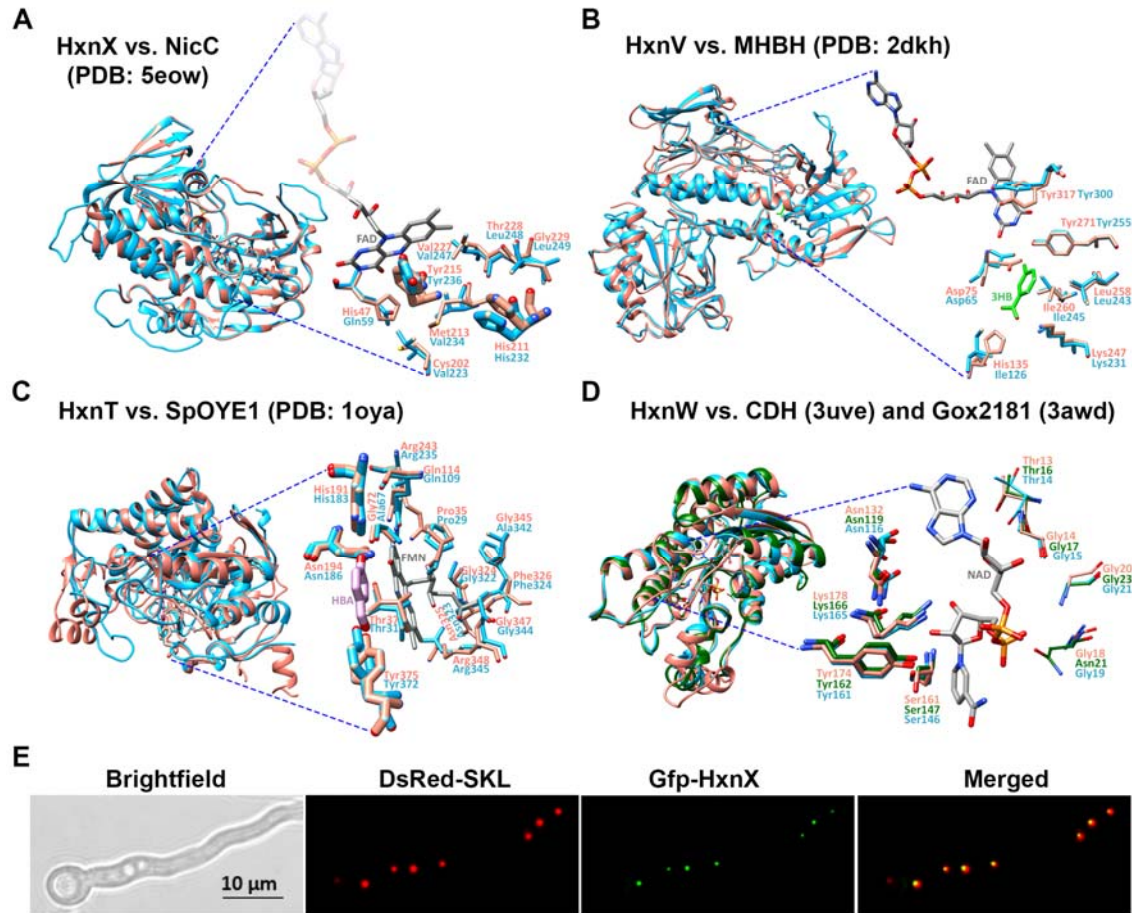

262

263 **Fig. 5. Superposition of the structural models of HxnX, HxnV, HxnT and HxnW with**  
 264 **their closest known structural homologs.**

265 Hxn enzymes are shown in blue; the structural homologs are shown in salmon and green  
 266 colors. For each model, the image to the left shows the superposition of the compared proteins  
 267 in ribbon view and includes the modeled substrate and/or cofactor. The substrate interacting  
 268 side chains are shown as magnified insets in stick view to the right of each model. FMN, FAD  
 269 and NAD cofactors are shown by grey sticks. (A) HxnX versus 6-NA 3-monooxygenase  
 270 (NicC) from *Pseudomonas putida* (PDB code: 5eow) (16). Thick sticks show 6-NA binding  
 271 residues, while thin sticks show additional active site residues of NicC. (B) HxnV versus 3-  
 272 hydroxybenzoate hydroxylase (MHBH) from *Comamonas testosteroni* (PDB code: 2dkh)  
 273 (18). 3HB: 3-hydroxybenzoic acid (3HB) substrate (green sticks). Sticks show the 3HB  
 274 substrate binding residues of MHBH. (C) HxnT versus old yellow enzyme 1 (OYE1) of  
 275 *Saccharomyces pastorianus* (PDB code: 1oya) (19). HBA: para-hydroxybenzaldehyde ligand  
 276 of SpOYE1 (green sticks). Thin sticks: FMN binding residues; thick sticks: HBA binding  
 277 residues of SpOYE1. (D) HxnW versus the polyol dehydrogenase enzyme Gox2181 from  
 278 *Gluconobacter oxidans* (PDB code: 3awd) and carveol dehydrogenase CDH from  
 279 *Mycobacterium avium* (PDB code: 3uve) (20, 21). Thick sticks: active site residues in  
 280 Gox2181 and CDH (20-22); thin sticks: residues of TG(X)<sub>3</sub>GXG NAD(P) binding motif in  
 281 HxnW, characteristic of the fungal-type ketoreductases. Quality assessments of the Hxn  
 282 models are summarized in *SI Appendix* Table S4. (E) Subcellular localization of the Gfp-  
 283 HxnX fusion protein. Gfp-HxnX is co-expressed with DsRed-SKL (peroxisome targeted red  
 284 fluorescent protein (23, 24)) in strain HZS.579. Fluorescent microscopy was carried out by

285 using Zeiss 09 and 15 filter sets for DsRed and Gfp, respectively. Conidia were germinated  
286 for 6.5 h at 37 °C on the surface coverslips submerged in MM prior to microscopy. Scale bar  
287 represents 10 µm.  
288

289 The PTS-1 signal is conserved among the HxnX proteins present in other Pezizomycotina  
290 (11). No other *hxn* encoded enzyme carries a sub-cellular localization signal, which however  
291 does not exclude the possibility that the corresponding pathway-step(s) may occur in an  
292 organelle.

293 While constructing double mutant strains, we were surprised that, the *hxnSΔ hxnTΔ* double  
294 deletion strain utilizes 10 mM 6-NA more efficiently than the wild type control or the single  
295 *hxnSΔ* or *hxnTΔ* deletion mutants (Fig. 3A). The ORFs of the two divergently transcribed  
296 genes were deleted in the double mutant, the intergenic region between the start codons was  
297 left intact, excluding any cis-acting regulatory effects on other genes of the cluster (see  
298 Materials and methods). The explanation of this phenotype may relate to the intracellular pool  
299 of NAD/NADH. NAD is the final electron acceptor of HxnS (8), and the presumed electron  
300 donor of HxnT (*Sl Appendix* Fig. S3). Deletion of both cognate genes may increase the  
301 intracellular NAD/NADH pool, thus facilitating the activity of the peroxisomal HxnX, which  
302 as a monooxygenase necessitates NADH to reduce the second oxygen atom in O<sub>2</sub>. It seems  
303 paradoxical that the co-induction of *hxnS* and *hxnT* with *hxnX* may actually impair the  
304 utilization of 6-NA.

305

### 306 **Subsequent metabolism of 2,5-DP depends on the 2,5-DP monooxygenase, HxnV**

307 N-source utilization tests showed that HxnV acts downstream of NA, 6-NA and 2,5-DP (Fig.  
308 3A). Induction tests (Hx Allp rows) are completely consistent with the above, in an *hxnVΔ*  
309 strain 2,5-DP does not act as an inducer. These results place the physiological inducer of the  
310 pathway downstream from 2,5-DP. In an *hxnR<sup>c7</sup>* background, where all other *hxn* genes are  
311 constitutively expressed (10, 11) a *hxnVΔ* strain accumulates 2,5-DP (Fig. 4A) in media

312 supplemented with 10 mM 6-NA, indicating that 2,5-DP is its substrate. This strain also  
313 secretes a green pigment (detected both visually and by UHPLC-HRMS analysis), seen both  
314 in solid medium around the colonies and in fermented broth (Fig. 4B). The green pigment was  
315 identified as the dimer form of 2,5-DP (Fig. 4B). A green pigment formation by non-  
316 enzymatic transformation of 2,5-DP was reported in the *P. putida* NicX loss-of-function  
317 mutant, blocked in the catabolism of 2,5-DP (25) and in a *P. fluorescens* strain grown on NA  
318 medium (26). The formation of the pigment is almost completely blocked in a *hxnR<sup>c7</sup> hxnXΔ*  
319 *hxnVΔ* strain, consistent with the position of the HxnX protein in the pathway as the main  
320 enzyme catalyzing the formation of 2,5-DP (see above) but also diminished in an *hxnR<sup>c7</sup>*  
321 *hxnYΔ hxnVΔ* strain, which suggests that HxnY may contribute to the formation of 2,5-DP  
322 from 6-NA (Figs. 2 and 4B).

323 HxnV includes a phenol 2-monooxygenase domain (PRK08294) and shows remarkable  
324 structural similarity to 3-hydroxybenzoate hydroxylase (MHBH), from *Comamonas*  
325 *testosteroni* (PDB code: 2dkh) (Fig. 5B) as well as to phenol 2-monooxygenase (PHOX) from  
326 *Trichosporon cutaneum* (PDB code: 1pn0) (Fig. 5B and *SI Appendix*, Fig. S4). The phenol  
327 ring interacting residues of MHBH (Asp75, Leu258, Ile260 and Tyr271) together with their  
328 spatial orientation are fully conserved in HxnV (Asp65, Leu243, Ile245 and Tyr255), while  
329 the carboxyl group binding Lys247 and His135 residues of MHBH are partially conserved in  
330 HxnV (Lys231 and Ile126 in HxnV) (Fig. 5B) (18). Thus, it is not unreasonable and in  
331 agreement with data shown above that 2,5-DP be the substrate of HxnV, and by analogy  
332 between HxnV and its known structural homologs, HxnV may hydroxylate the 6-carbon of  
333 2,5-DP resulting in 2,3,6-trihydroxypyridine (2,3,6-THP) formation (Fig. 2). This metabolite  
334 was not detected in the metabolome of any of the mutants, however the structurally identified  
335 upstream and downstream metabolites (2,5-DP and 5,6-dihydroxypiperidine-2-one (see

336 below), respectively) suggest that 2,3,6-THP is almost certainly the product of HxnV (Figs. 2  
337 and 4A).

338

339 **The 2,3,6-THP alkene reductase HxnT catalyzes the reduction of the pyridine ring**

340 Accumulation of a saturated derivative of 2,3,6-THP, 5,6-dihydropiperidine-2-one (5,6-  
341 DHPip-2-O) was exclusively observed in the metabolome of an *hxnR<sup>c7</sup> hxnW*Δ mutant (Fig.  
342 4A and see *SI Appendix* Table S2 for NMR results). This compound has not been detected  
343 previously in either eukaryotes or prokaryotes, and has not been synthesized chemically. 5,6-  
344 DHPip-2-O is altogether a new compound. The accumulation identified 5,6-DHPip-2-O as the  
345 substrate of HxnW but also implies that an upstream alkene reductase enzyme (HxnT, see Fig.  
346 2 and below) acts on the hitherto undetected product of HxnV. Logically the latter has to be  
347 2,3,6-THP. The putative alkene reductase, which supposedly converts 2,3,6-THP to the 5,6-  
348 DHPip-2-O, is HxnT (a member of the “old yellow enzymes” group). Comparison of the  
349 structural model of HxnT with its closest known structural homolog, old yellow enzyme 1  
350 (OYE1) of *Saccharomyces pastorianus* (PDB code: 1oya) showed that the para-  
351 hydroxybenzaldehyde binding residues of SpOYE1 (His191, Asn194, Tyr375) are remarkably  
352 conserved in HxnT (His183, Asn186, Tyr372) and that the FMN binding residues are almost  
353 completely conserved in HxnT (19) (Fig. 5C and *SI Appendix* Fig. S5 for further details). An  
354 *hxnT*Δ strain shows a leaky growth phenotype, most noticeably on 2,5-DP (Fig. 3A). The  
355 utilization of Hx in the inducer-test media is reduced but still clearly visible. Both results  
356 imply that while HxnT is responsible for the metabolism of the putative 2,5-DP metabolite to  
357 2,3,6-THP, another, yet unidentified enzyme must be catalyzing the same step. The deletion  
358 of *hxnW* identifies 5,6-DHPip-2-O as the physiological inducer of the pathway (NA and 6-NA  
359 serve as inducer precursors in the Hx Allp test in *hxnW*Δ, but not in *hxnX*Δ and to a reduced  
360 extent in *hxnT*Δ). 2,5-DP serves as an inducer precursor in *hxnX*Δ but not in *hxnV*Δ and to

361 reduced extent in *hxnT* $\Delta$ , which is in line with a redundantly functioning additional enzyme.  
362 While induction of a whole pathway by a metabolite such as the product of the first metabolic  
363 step has been described long ago (e.g. (27)), the pathway described in this article reports the  
364 unprecedented occurrence of concerted induction by an almost terminal metabolite.

365

366 **The 5,6-DHPip-2-one ketoreductase HxnW converts the 6-enol group of the piperidine**  
367 **compound to a keto group.**

368 5,6-DHPip-2-O, the product of HxnT, is the substrate of HxnW. HxnW is a short chain  
369 dehydrogenase/reductase and has a structurally conserved NADB\_Rossmann fold domain  
370 (22) with a TG(X)<sub>3</sub>GXG (14-21 AAs) motif that is characteristic of the fungal ketoreductases  
371 (*Sl Appendix Fig. S6*). Comparison of HxnW to its closest known structural homologs,  
372 NAD(H)-dependent polyol dehydrogenase Gox2181 from *Gluconobacter oxydans* (PDB  
373 code: 3awd) and carveol dehydrogenase CDH from *Mycobacterium avium* (PDB code: 3uve)  
374 (20, 21) showed the striking conformity of the active site residues (Asn119, Ser147, Tyr162  
375 and Lys166) (*Fig. 5D*). HxnW, similarly to its structural homologs, dehydrogenates a  
376 hydroxyl group of 5,6-DHPip-2-O resulting in the formation of 3-hydroxypiperidine-2,6-  
377 dione (3-HPip-2,6-DO) (*Figs. 2 and 4A*). Similarly to 5,6-DHPip-2-O, 3-HPip-2,6-DO is also  
378 a new natural metabolite that has not been detected previously in any organism.

379

380 The 5,6-DHPip-2-O was not accumulated in a double deleted *hxnR<sup>c7</sup> hxnW* $\Delta$  *hxnV* $\Delta$  strain,  
381 however, it was accumulated in a *hxnR<sup>c7</sup> hxnW* $\Delta$  *hxnX* $\Delta$  strain. This implies that a second  
382 enzyme activity may be capable of metabolizing 6-NA to 2,5-DP. We propose this enzyme to  
383 be HxnY (*Fig. 2*). A deletion of *hxnY* diminishes the utilization of 6-NA (*Fig. 3A*). Its  
384 contribution to the 2,5-DP pool must be minor, as an *hxnX* $\Delta$  strain does not utilize at all either  
385 NA or 6-NA as a nitrogen source (*Fig 3A*). The ancillary activity of HxnY is supported by the



386 reduced growth on Hx Allp media in the presence of inducer precursors (Fig 3A). The effect  
387 of *hxnY* $\Delta$  is evident on 6-NA but not on NA. This is in line with the fact that 6-NA is a better  
388 nitrogen source than NA, and thus, the activity of HxnY may not be limiting when the  
389 organism grows on NA but may be limiting on 6-NA.

390 HxnY is an  $\alpha$ -ketoglutarate-dependent dioxygenase, its closest structural homolog is the  
391 thymine-7-hydroxylase (T7H) of *Neurospora crassa* (PDB code: 5c3q) (28), which catalyzes  
392 the sequential conversion of the methyl group of thymine to a carboxyl group (28, 29). The  
393 conservation of the  $\alpha$ -ketoglutarate and Fe<sup>2+</sup> binding residues and those involved in  $\pi$ - $\pi$   
394 stacking and hydrophobic interactions with the pyrimidine ring of T7H are consistent with the  
395 putative activity of HxnY on 6-NA (*SI Appendix* Fig. S7).

396

397 **The 3-HPip-2,6-DO cyclic imide hydrolase HxnM catalyzes the opening of the piperidine**  
398 **ring**

399 3-HPip-2,6-DO (generated by HxnW) was accumulated exclusively, albeit in small quantity,  
400 in the fermented broth of an *hxnM* $\Delta$  strain (Fig. 4A). HxnM shares 74.3% identity (with 100%  
401 query coverage) with a *Candida boidinii* enzyme (OWB68015) belonging to the EC 3.5.99  
402 enzyme class (GOterm: 0016810, hydrolase activity on non-peptide C-N bonds) and 64.2%  
403 identity (with 95.4% query coverage) with AAY98498, a cyclic imide hydrolase homolog,  
404 from *P. putida* (30) (*SI Appendix* Fig. S8). HxnM shows striking structural similarity with its  
405 closest known structural homolog, the alleged peptidoglycan deacetylase of unknown  
406 substrate specificity HpPgdA from *Helicobacter pylori* (PDB code: 3qbu), related to cyclic  
407 imidases (31) (*SI Appendix* Fig. S8). The closest phylogenetic relative of HpPgdA is an  
408 allantoinase (PuuE) from *Pseudomonas aeruginosa*, whose natural substrate is a small cyclic  
409 imide (31, 32). We propose that HxnM opens the ring of 3-HPip-2,6-DO between a C2 carbon  
410 and nitrogen, generating  $\alpha$ -hydroxyglutaramate ( $\alpha$ -HGA), a compound which was detected

411 exclusively in the metabolome of an *hxnR<sup>c7</sup> hxnNΔ* strain (Figs. 2 and 4A). A ring opening is  
412 a necessary step to generate NH<sub>4</sub><sup>+</sup> which can serve as a nitrogen source. In *A. nidulans*,  
413 uniquely among studied NA-catabolizing organisms, the generation of a piperidine ring from  
414 a pyridine ring precedes the hydrolysis of a C-N bond. In the different pathways described in  
415 bacteria, the ring opening may take place by an oxidative process in an aromatic ring (such as  
416 in *P. putida*) or in a hydrolytic process on saturated or partially saturated rings in other  
417 bacteria (*Eubacterium barkeri* and *Azorhizobium caulinodans*) (2, 3, 33) (Fig. 6).

418

#### 419 **The α-HGA amide hydrolase HxnN is involved in nitrogen salvage from NA**

420 HxnN is a putative amide hydrolase, its closest structural homolog is the fatty acid amide  
421 hydrolase 1 (FAAH1) from *Rattus norvegicus*. Deletion of *hxnN* diminishes but not  
422 abolishes the utilization of NA, 6-NA and 2,5-DP as sole nitrogen sources. While *hxnN*  
423 encodes the last enzyme of the *hxn* regulon, the growth tests demonstrate that (a) yet-  
424 unidentified hydrolase(s) contribute(s) to the deamidation of α-HGA (Fig. 3A). Several genes  
425 encoding putative paralogues of HxnN are extant in the genome of *A. nidulans* with identities  
426 to HxnN up to 39%. Superposition of the structural model of HxnN with its closest known  
427 structural homolog, FAAH1 (PDB code: 2vya), shows that the catalytic triad residues from  
428 FAAH1 involved in the hydrolysis of the amide bond, the “oxyanion hole” forming residues  
429 and the Ser residue that interacts with the catalytic triad residues (34, 35) are fully conserved  
430 in HxnN (*SI Appendix* Fig. S8). None of the prokaryotic amide hydrolases operating in the  
431 NA catabolic routes (ω-amidases) (2, 36, 37) show considerable similarity to HxnN. Amide  
432 hydrolysis of 3-HPip-2,6-DO generates α-hydroxyglutarate (α-HG) (Figs. 2 and 4A), which  
433 has not been detected as intermediate in any of the elucidated prokaryotic NA catabolic  
434 routes.

435

436 **Toxicity of intermediate catabolic compounds**

437 In an *hxnR<sup>c</sup>7* background all *hxn* genes are constitutively transcribed. We can thus investigate  
 438 the accumulation of NA metabolites without the need for the physiological inducer metabolite  
 439 of the pathway. The accumulated 2,5-DP in *hxnVΔ* is a strong inhibitor of growth, while 5,6-  
 440 DHPip-2-O in *hxnWΔ* mildly, and 6-NA, 3-HPip-2,6-DO and  $\alpha$ -HGA in *hxnXΔ*, *hxnMΔ* and  
 441 *hxnNAΔ*, respectively, slightly inhibit growth (Fig. 3B). Growth inhibition by pathway  
 442 metabolites was also detected when acetamide was the sole N-source.

443

444 **Concluding remarks**

445 The eukaryotic NA catabolic pathway described above shows clear differences from recently  
 446 known prokaryotic pathways in steps that precede (compounds 5,6-DHPip-2-O and 3-HPip-  
 447 2,6-DO) and follow (compounds  $\alpha$ -HGA and  $\alpha$ -HG) ring opening. Conversion of NA to  
 448 2,3,6-THP through 2,5-DP was not detected in prokaryotes, albeit these intermediates appear  
 449 as elements of various pathways (Fig. 6).

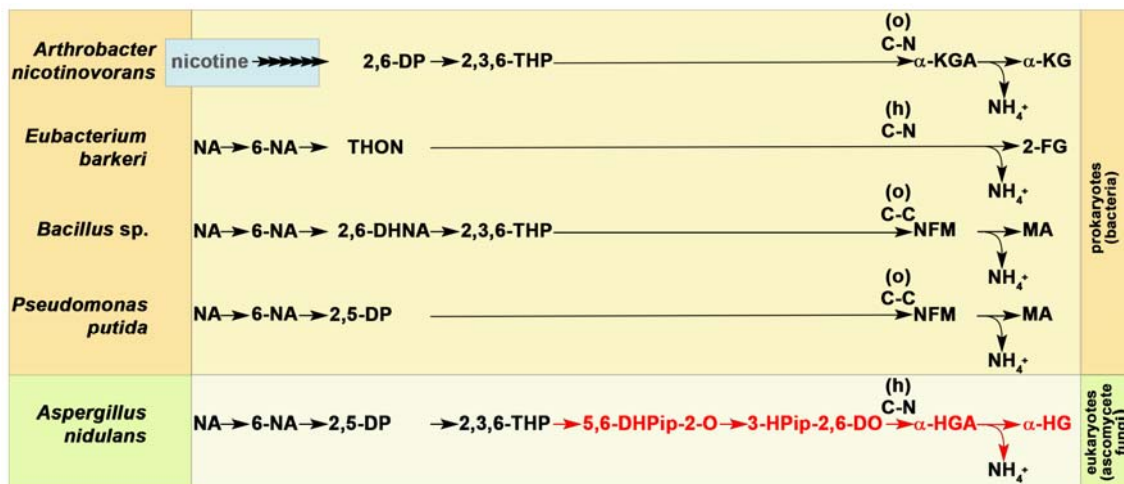

450

451 **Fig. 6. Comparative demonstration of novelties of the eukaryotic nicotine catabolic**  
 452 **pathway.**

453 The catabolism of nicotine by *A. nicotinovorans* involves the opening and release of the  
 454 pyrrolidine ring, leading to 2,6-DP, which is further catabolized through 2,3,6-THP, an  
 455 intermediate of pathways in *Bacillus sp.* as well as in *A. nidulans*. The nicotine pathway  
 456 upstream to 2,6-DP is not relevant to the present work, which is indicated linked arrows and

457 blue boxing. Red color marks those steps and pathway metabolites that have never been  
458 identified in prokaryotic NA catabolic pathways. While the eukaryotic NA catabolic pathway  
459 has only been studied experimentally in *A. nidulans*, genes encoding the whole or part of the  
460 pathway are present in many ascomycete fungi (11). Abbreviations: NA: nicotinic acid; 6-  
461 NA: 6-hydroxynicotinic acid; 2,6-DP: 2,6-dihydroxypyridine, 2,5-DP: 2,5-dihydroxypyridine;  
462 2,6-DHNA: 2,6-dihydroxynicotinic acid; THON: 1,4,5,6-tetrahydro-6-oxonicotinic acid;  
463 2,3,6-THP: 2,3,6-trihydroxypyridine; 5,6-DHPip-2-O: 5,6-dihydropiperidine-2-one; 3-  
464 HPip-2,6-DO: 3-hydropiperidine-2,6-dione; MA: maleamic acid; NFM: N-formylmaleamic  
465 acid; 2-FG: (*S*)-2-formylglutarate;  $\alpha$ -KGA:  $\alpha$ -ketoglutaramic acid;  $\alpha$ -KG:  $\alpha$ -ketoglutaric  
466 acid;  $\alpha$ -HGA:  $\alpha$ -hydroxyglutaramic acid;  $\alpha$ -HG:  $\alpha$ -hydroxyglutaric acid; C-C: site of ring-  
467 opening occurs between two carbons; C-N: site of ring-opening occurs between carbon and  
468 nitrogen; (o): ring-opening is oxidative; (h): ring-opening is hydrolytic.  
469

470 E.g. 2,5-DP is formed from 6-NA in *Pseudomonas* sp., which is not hydroxylated further but  
471 the pyridine ring is cleaved between C5-C6 (2) and 2,3,6-THP in *Bacillus* sp. is formed from  
472 2,6-dihydroxynicotinic acid (38). Notably, formation of 2,3,6-THP occurs in the nicotine  
473 catabolism by *Arthrobacter* sp. through as a product of 2,6-dihydroxypyridine metabolism  
474 (reviewed in (39)). Steps of the saturation of the pyridine ring of 2,3,6-THP to 5,6-DHPip-2-O  
475 by the OYE-related alkene reductase HxnT (and a yet-unidentified enzyme) and oxidation of  
476 5,6-DHPip-2-O to 3-HPip-2,6-DO by the ketoreductase/polyol dehydrogenase HxnW have  
477 hitherto only been detected in this pathway (Figs. 2 and 6). Moreover, 5,6-DHPip-2-O is a  
478 completely new chemical compound. The ring opening of the piperidine ring occurs between  
479 C-N (by the cyclic imidase HxnM) generating  $\alpha$ -HGA, which has not been found previously  
480 in NA catabolic pathways (Fig. 6). In aerobic prokaryotic pathways the ring opening occurs  
481 either between C-C of 2,5-DP (by extradiol dioxygenase) or 2,3,6-THP (in *Pseudomonas* sp.  
482 and *Bacillus* sp., respectively) or between C-N of 2,3,6-THP (in *Rhodococcus* sp. and  
483 *Arthrobacter* sp. by polyketide cyclase) generating N-formyl maleamic acid or  $\alpha$ -  
484 ketoglutaramate (2, 36-38) (Fig. 6). In the following steps in prokaryotes, the amide is  
485 hydrolyzed by  $\omega$ -amidases (2, 36, 37) not related to the HxnN amidase. The anaerobic  
486 pathway described in *E. barkeri* and *Azorhizobium caulinodans* involves the partial saturation  
487 of the pyridine ring of 6-NA that results in 1,4,5,6-tetrahydro-6-oxonicotinic acid (THON),

488 followed by hydrolytic ring opening of THON between C-N and the simultaneous  
489 deamination (by a bifunctional amidase in *E. barkeri*) resulting in (S)-2-formylglutarate  
490 formation (3, 33) (Fig. 6). While no redundantly functioning enzymes are involved in the  
491 prokaryotic routes, three steps of the fungal catabolism use alternative enzymes (HxnY and  
492 two unidentified enzymes, one functioning redundantly with HxnT, the other with HxnN)  
493 (Fig. 2). Catabolic steps downstream to 2,3,6-THP differ from those in prokaryotes and lead  
494 to the newly identified intermediate metabolites 5,6-DHPip-2-O and 3-HPip-2,6-DO (Fig. 6).  
495 The identification of these new metabolites may be of industrial or agricultural importance.  
496 The complete description of this eukaryotic pathway further illustrates the convergent  
497 evolution, both at the level of individual enzymes and at the level of a whole pathway.

498

## 499 **Materials and Methods**

### 500 **Strains and growth conditions**

501 The *A. nidulans* strains used in this study are listed in *SI Appendix* Table S3. Standard genetic  
502 markers are described in [http://www.fgsc.net/Aspergillus/gene\\_list/](http://www.fgsc.net/Aspergillus/gene_list/). Minimal media (MMs)  
503 with glucose as sole carbon source and different sole nitrogen sources were used (40, 41). The  
504 media were supplemented with vitamins (<http://www.fgsc.net>) according to the requirements  
505 of each auxotrophic strain. Nitrogen sources, inducers, repressors and inhibitors were used at  
506 the following concentrations: 10 mM NA or 10 mM 6-NA (1 : 100 dilution from 1 M NA or  
507 6-NA dissolved in 1 M sodium hydroxide), 10 mM 2,5-DP added as a powder, 10 mM NAA  
508 added as a powder, 1 mM Hx added as a powder, 10 mM acetamide as sole N-sources; NA  
509 sodium salt, 6-NA sodium salt, 2,5-DP, NAA in 1 mM or 100  $\mu$ M final concentration as  
510 inducers; 5.5 mM Allp as inhibitor of purine hydroxylase I (HxA) enzyme activity. Strains  
511 were grown at 37 °C for the indicated times.

512

513 For metabolite extraction, the mycelia of *hxnR<sup>c7</sup>* strains with different *hxn* gene deletion(s)  
514 were grown for 16 h on MM with 10 mM acetamide as sole N-source at 37 °C with 150 r.p.m.  
515 agitation, which was followed by shifting the mycelia to MM with 10 mM 6-NA as substrate  
516 without additional utilizable N-source and incubated for further 24 h.

517

### 518 **Gene deletions**

519 Deletion of *hxnT/R/Y/Z/P/X/W/V/M/N* genes were constructed as described previously (42).  
520 The gene targeting substitution cassette was constructed by double-joint PCR (43), where the  
521 *riboB<sup>+</sup>*, *pabaA<sup>+</sup>* or *pyroA<sup>+</sup>* genes were used as transformation markers. Construction of double  
522 and triple deletion mutants or changing the *hxnR<sup>+</sup>* genetic background of mutants to *hxnR<sup>c7</sup>*  
523 was carried out by standard genetic crosses or transformation followed by checking via PCR  
524 and Southern blots. DNA was prepared from *A. nidulans* as described by Specht et al. (44).  
525 Hybond-N membranes (Amersham/GE Healthcare) were used for Southern blots (45).  
526 Southern hybridizations were done by DIG DNA Labeling and Detection Kit (Roche)  
527 according to the manufacturer's instructions. Transformations of *A. nidulans* protoplasts were  
528 performed as described by Antal et al. (46). The protoplasts were prepared from mycelia  
529 grown on cellophane (47, 48) using a 4% solution of Glucanex (Novozymes, Switzerland) in  
530 0.7 M KCl. Transformation of  $5 \times 10^7$  protoplasts was carried out with 100–500 ng of fusion  
531 PCR products. Primers used in the manipulations described above are listed in *SI Appendix*  
532 Table S5. For detailed description of single and multiple gene deletions see *SI Appendix* Data  
533 Table S6 and Figs. S10 and S11.

534

### 535 **Construction and microscopy of Gfp-HxnX (N-terminal fusion) expressing strains**

536 Construction of the *gfp-hxnX* expressing strain is described in details in *SI Appendix* Data.  
537 Briefly, a bipartite cassette of the *gfp-hxnX* fusion was constructed by Double-Joint PCR (DJ-

538 PCR) (43), and cloned into the pAN-HZS-1 vector (42) yielding the *gfp-hxnX* expression  
539 vector pAN-HZS-13, which was used to transform an *hxnXΔ* strain (HZS.534), which carries  
540 a peroxisome marker (expresses DsRed-SKL) (23, 24) (*SI Appendix Data Fig. S12*).  
541 Transformants carrying the *gfp-hxnX* transgene from 1-10 copies were isolated. Gfp-HxnX  
542 localization was studied in HZS.579 that carried the transgene in 7 copies. Conidiospores of  
543 HZS.579 was germinated for 6.5 h on the surface of coverslips submerged in MM at 37 °C.  
544 Young hyphae were examined by fluorescence microscopy using Zeiss 09 and 15 filter sets  
545 for DsRed and GFP, respectively.

546

#### 547 **Metabolite analysis**

548 For metabolite extraction, 1 ml of methanol/water (8/2) was added to both 25 mg of freeze-  
549 dried mycelium and 2 ml freeze-dried fermentation broth from each cultivation followed by  
550 vortexing for 1 min and sonication at 50 W for 3 x 5 min on ice in between vortexing the  
551 samples for 30 s. After centrifugation (20 000 g, 10 min, 4 °C) the supernatants were  
552 subjected to UHPLC-HRMS analysis. UHPLC-HRMS measurements were performed using a  
553 DionexUltimate 3000 UHPLC system (Thermo Scientific) coupled to a Q Exactive Plus  
554 hybrid quadrupole-Orbitrap mass spectrometer (Thermo Scientific) operating with a heated  
555 electrospray interface (HESI). Metabolites were separated on an Acquity UPLC BEH Amide  
556 (2.1 x 100 mm, 1.7 μm) column (Waters, Hungary) thermostated at 40 °C. Acetonitrile (A)  
557 and water (B) both supplemented with 0.1% formic acid served as mobile phases. A gradient  
558 elution program was applied as follows: 0-0.5 min: 97% A, 0.5-4 min: 97-88% A, 4-10 min:  
559 88-40% A, 10-13 min: 40% A, 13-13.5 min: 40-97% A, 13.5-27.5 min: 97% A. The flow rate  
560 was kept at 0.3 ml/min, and the injection volume was 3 μl.

561 All samples were analyzed in both positive and negative ionization mode using the following  
562 ion source settings: the temperature of the probe heater and ion transfer capillary, spray

563 voltage, sheath gas flow rate, auxiliary gas flow rate and S-lens RF level were set to 300 °C,  
564 350 °C, 3.5 kV, 40 arbitrary unit, 10 arbitrary unit and 50 arbitrary unit, respectively. For data  
565 acquisition full-scan/data-dependent MS/MS method (Full MS/ddMS2) was applied, where  
566 the full scan MS spectra were acquired at a resolution of 70,000 from  $m/z$  50 to 500 with a  
567 maximum injection time of 100 ms. For every full scan, 5 ddMS2-scans were carried out with  
568 a resolution of 17,500 and a minimum automatic gain control target of  $1.00 \times 10^5$ . Isolation  
569 window was 0.4  $m/z$ . Instrument control and data collection were carried out using Trace  
570 Finder 4.0 (Thermo Scientific) software. The raw data files were processed by Compound  
571 Discoverer 2.1 software for chromatographic alignment, compound detection, and accurate  
572 mass determination.

573 All NMR experiments were accomplished on a Bruker Ultrashield 500 Plus spectrometer,  
574 solvent residual signals (methanol, DMSO) adopted as internal standards. Due to solubility  
575 issue,  $\alpha$ -HGA was measured in its ammonium salt form.

576

#### 577 **Purification of 5,6-DHPip-2-O and $\alpha$ -HGA**

578 4 g and 14 g of freeze dried mycelia of 5,6-DHPip-2-O and  $\alpha$ -HGA accumulating strains were  
579 extracted in 160 ml and 560 ml of methanol, respectively. The extracts were then evaporated  
580 to dryness and were purified with dry sample loading injection on a CombiFlash EZPrep flash  
581 chromatograph (Teledyne Isco, USA) using 0.063-0.2 mm spherical silica (Molar Chemicals,  
582 Hungary) as solid phase. The metabolite detected at  $m/z$  132.0656 was separated with ethyl  
583 acetate/methanol, 4/1 (V/V) supplemented with 5% aqueous ammonia as a mobile phase  
584 resulting 5 mg material. For the metabolite detected at  $m/z$  146.0461, the separation using  
585 ethyl acetate/methanol, 7/3 (V/V) supplemented with 5% aqueous ammonia was followed by  
586 additional separation step, where a mixture of methanol/water (95/5, V/V) as mobile phase



587 was applied to achieve 6 mg purified material. At each step of the purification, the purities of  
588 the metabolites were determined via UHPLC-HRMS method described above.

589

### 590 ***In silico* structural analysis of Hxn proteins**

591 Structural models of the Hxn enzymes were obtained with I-Tasser (49) followed by refining  
592 the model using ModRefiner (50) and Ramachandran plot quality assessment (results of  
593 model- and superpositioning quality assessments are summarized in *SI Appendix* Table S4).  
594 Result of I-Tasser analysis (49) provided a list of structural homologs, those with the best C-  
595 score were chosen to superpose with the refined models.

596

### 597 **Acknowledgement**

598 We thank Gábor Endre the purification of commercially available 6-hydroxynicotinic acid  
599 used as substrate in medium for metabolome analysis. A.G. was supported by grants 20391  
600 3/2018/FEKUSTRAT, NKFIH K 123952, LP2018-15/2018. The project has received funding  
601 from the EU's Horizon 2020 research and innovation program under grant agreement No.  
602 739593. Work was supported by the Hungarian National Research, Development and  
603 Innovation Office (NKFIH K16-119516) and by the Hungarian Government (GINOP-2.3.2-  
604 15-2016-00012).

605

### 606 **References**

607

- 608 1. S. Fetzner, Enzymes involved in the aerobic bacterial degradation of N-heteroaromatic  
609 compounds: molybdenum hydroxylases and ring-opening 2,4-dioxygenases.  
610 *Naturwissenschaften* **87**, 59-69 (2000).
- 611 2. J. I. Jimenez *et al.*, Deciphering the genetic determinants for aerobic nicotinic acid  
612 degradation: the nic cluster from *Pseudomonas putida* KT2440. *Proc Natl Acad Sci U*  
613 *S A* **105**, 11329-11334 (2008).
- 614 3. A. Alhapel *et al.*, Molecular and functional analysis of nicotinate catabolism in  
615 *Eubacterium barkeri*. *Proc Natl Acad Sci U S A* **103**, 12341-12346 (2006).

- 616 4. M. Nagel, J. R. Andreesen, Purification and characterization of the molybdoenzymes  
617 nicotinate dehydrogenase and 6-hydroxynicotinate dehydrogenase from *Bacillus*  
618 *niacini*. *Arch Microbiol* **154**, 605-613 (1990).
- 619 5. J. R. Andreesen, S. Fetzner, The molybdenum-containing hydroxylases of nicotinate,  
620 isonicotinate, and nicotine. *Met Ions Biol Syst* **39**, 405-430 (2002).
- 621 6. C. Scazzocchio, The genetic control of molybdoflavoproteins in *Aspergillus nidulans*.  
622 II. Use of NADH dehydrogenase activity associated with xanthine dehydrogenase to  
623 investigate substrate and product inductions. *Mol Gen Genet* **125**, 147-155 (1973).
- 624 7. N. J. Lewis, P. Hurt, H. M. Sealy-Lewis, C. Scazzocchio, The genetic control of the  
625 molybdoflavoproteins in *Aspergillus nidulans*. IV. A comparison between purine  
626 hydroxylase I and II. *Eur J Biochem* **91**, 311-316 (1978).
- 627 8. R. K. Mehra, M. P. Coughlan, Purification and properties of purine hydroxylase II  
628 from *Aspergillus nidulans*. *Arch Biochem Biophys* **229**, 585-595 (1984).
- 629 9. C. Scazzocchio, Ed., *The Genetics of the Molybdenum-Containing Enzymes*  
630 (Pergamon Press, Oxford, New York, Toronto, Sydney, Paris, Frankfurt, 1980), pp  
631 487-515.
- 632 10. J. Amon *et al.*, A eukaryotic nicotinate-inducible gene cluster: convergent evolution in  
633 fungi and bacteria. *Open Biol* **7**, 170199 (2017).
- 634 11. E. Bokor *et al.*, Genome organisation and evolution of a eukaryotic nicotinate co-  
635 inducible pathway. *bioRxiv*, 2021.2004.2019.440407 (2021).
- 636 12. T. M. Martins, C. Martins, P. Guedes, C. Silva Pereira, Twists and Turns in the  
637 Salicylate Catabolism of *Aspergillus terreus*, Revealing New Roles of the 3-  
638 Hydroxyanthranilate Pathway. *mSystems* **6** (2021).
- 639 13. C. Scazzocchio, F. B. Holl, A. I. Foguelman, The genetic control of  
640 molybdoflavoproteins in *Aspergillus nidulans*. Allopurinol-resistant mutants  
641 constitutive for xanthine-dehydrogenase. *Eur J Biochem* **36**, 428-445 (1973).
- 642 14. M. Ghislain, E. Talla, J. M. Francois, Identification and functional analysis of the  
643 *Saccharomyces cerevisiae* nicotinamidase gene, *PNCI*. *Yeast* **19**, 215-224 (2002).
- 644 15. C. Sibthorp *et al.*, Transcriptome analysis of the filamentous fungus *Aspergillus*  
645 *nidulans* directed to the global identification of promoters. *BMC Genomics* **14**, 847  
646 (2013).
- 647 16. K. A. Hicks *et al.*, Structural and Biochemical Characterization of 6-Hydroxynicotinic  
648 Acid 3-Monooxygenase, A Novel Decarboxylative Hydroxylase Involved in Aerobic  
649 Nicotinate Degradation. *Biochemistry* **55**, 3432-3446 (2016).
- 650 17. H. Nakano *et al.*, Purification, characterization and gene cloning of 6-  
651 hydroxynicotinate 3-monooxygenase from *Pseudomonas fluorescens* TN5. *Eur J*  
652 *Biochem* **260**, 120-126 (1999).
- 653 18. T. Hiromoto, S. Fujiwara, K. Hosokawa, H. Yamaguchi, Crystal structure of 3-  
654 hydroxybenzoate hydroxylase from *Comamonas testosteroni* has a large tunnel for  
655 substrate and oxygen access to the active site. *J Mol Biol* **364**, 878-896 (2006).
- 656 19. K. M. Fox, P. A. Karplus, Old yellow enzyme at 2 Å resolution: overall structure,  
657 ligand binding, and comparison with related flavoproteins. *Structure* **2**, 1089-1105  
658 (1994).
- 659 20. X. Liu, Z. Yuan, Y. Adam Yuan, J. Lin, D. Wei, Biochemical and structural analysis  
660 of Gox2181, a new member of the SDR superfamily from *Gluconobacter oxydans*.  
661 *Biochem Biophys Res Commun* **415**, 410-415 (2011).
- 662 21. L. Baugh *et al.*, Increasing the structural coverage of tuberculosis drug targets.  
663 *Tuberculosis (Edinb)* **95**, 142-148 (2015).
- 664 22. K. L. Kavanagh, H. Jornvall, B. Persson, U. Oppermann, Medium- and short-chain  
665 dehydrogenase/reductase gene and protein families : the SDR superfamily: functional

- 666 and structural diversity within a family of metabolic and regulatory enzymes. *Cell Mol*  
667 *Life Sci* **65**, 3895-3906 (2008).
- 668 23. P. Magliano, M. Flipphi, B. A. Arpat, S. Delessert, Y. Poirier, Contributions of the  
669 peroxisome and beta-oxidation cycle to biotin synthesis in fungi. *J Biol Chem* **286**,  
670 42133-42140 (2011).
- 671 24. M. Flipphi, N. Oestreicher, V. Nicolas, A. Guitton, C. Velot, The *Aspergillus nidulans*  
672 *acuL* gene encodes a mitochondrial carrier required for the utilization of carbon  
673 sources that are metabolized via the TCA cycle. *Fungal Genet Biol* **68**, 9-22 (2014).
- 674 25. J. I. Jimenez (2006) Análisis genómico del catabolismo de compuestos aromáticos en  
675 *Pseudomonas putida* KT2440: caracterización molecular de la ruta de degradación del  
676 ácido nicotínico. in *Universidad Complutense de Madrid, Facultad de Ciencias*  
677 *Químicas, Departamento de Bioquímica y Biología molecular* (Universidad  
678 Complutense de Madrid, Facultad de Ciencias Químicas, Departamento de  
679 Bioquímica y Biología molecular  
680 Madrid), p 255.
- 681 26. E. J. Behrman, R. Y. Stanier, The bacterial oxidation of nicotinic acid. *J Biol Chem*  
682 **228**, 923-945 (1957).
- 683 27. C. Scazzocchio, A. J. Darlington, The induction and repression of the enzymes of  
684 purine breakdown in *Aspergillus nidulans*. *Biochim Biophys Acta* **166**, 557-568  
685 (1968).
- 686 28. W. Li, T. Zhang, J. Ding, Molecular basis for the substrate specificity and catalytic  
687 mechanism of thymine-7-hydroxylase in fungi. *Nucleic Acids Res* **43**, 10026-10038  
688 (2015).
- 689 29. C. K. Liu, C. A. Hsu, M. T. Abbott, Catalysis of three sequential dioxygenase  
690 reactions by thymine 7-hydroxylase. *Arch Biochem Biophys* **159**, 180-187 (1973).
- 691 30. Y. W. Shi, L. F. Cui, J. M. Yuan, Gene cloning, expression, and substrate specificity  
692 of an imidase from the strain *Pseudomonas putida* YZ-26. *Curr Microbiol* **55**, 61-64  
693 (2007).
- 694 31. M. M. Shaik, L. Cendron, R. Percudani, G. Zanotti, The structure of *Helicobacter*  
695 *pylori* HP0310 reveals an atypical peptidoglycan deacetylase. *PLoS One* **6**, e19207  
696 (2011).
- 697 32. H. Matsumoto, S. Ohta, R. Kobayashi, Y. Terawaki, Chromosomal location of genes  
698 participating in the degradation of purines in *Pseudomonas aeruginosa*. *Mol Gen*  
699 *Genet* **167**, 165-176 (1978).
- 700 33. C. L. Kitts, J. P. Lapointe, V. T. Lam, R. A. Ludwig, Elucidation of the complete  
701 *Azorhizobium* nicotinate catabolism pathway. *J Bacteriol* **174**, 7791-7797 (1992).
- 702 34. S. Shin *et al.*, Structure of malonamidase E2 reveals a novel Ser-cisSer-Lys catalytic  
703 triad in a new serine hydrolase fold that is prevalent in nature. *EMBO J* **21**, 2509-2516  
704 (2002).
- 705 35. M. Mileni *et al.*, Structure-guided inhibitor design for human FAAH by interspecies  
706 active site conversion. *Proc Natl Acad Sci U S A* **105**, 12820-12824 (2008).
- 707 36. J. Vaitekunas, R. Gasparaviciute, R. Rutkiene, D. Tauraite, R. Meskys, A 2-  
708 Hydroxypyridine Catabolism Pathway in *Rhodococcus rhodochrous* Strain PY11.  
709 *Appl Environ Microbiol* **82**, 1264-1273 (2016).
- 710 37. M. Mihasan *et al.*, Proteomics based analysis of the nicotine catabolism in  
711 *Paenarthrobacter nicotinovorans* pAO1. *Sci Rep* **8**, 16239 (2018).
- 712 38. P. E. Holmes, S. C. Rittenberg, H. J. Knackmuss, The bacterial oxidation of nicotine.  
713 8. Synthesis of 2,3,6-trihydroxypyridine and accumulation and partial characterization  
714 of the product of 2,6-dihydroxypyridine oxidation. *J Biol Chem* **247**, 7628-7633  
715 (1972).

- 716 39. R. Brandsch, Microbiology and biochemistry of nicotine degradation. *Appl Microbiol*  
717 *Biotechnol* **69**, 493-498 (2006).
- 718 40. D. J. Cove, The induction and repression of nitrate reductase in the fungus *Aspergillus*  
719 *nidulans*. *Biochim Biophys Acta* **113**, 51-56 (1966).
- 720 41. C. Scazzocchio, N. Sdrin, G. Ong, Positive regulation in a eukaryote, a study of the  
721 *uaY* gene of *Aspergillus nidulans*: I. Characterization of alleles, dominance and  
722 complementation studies, and a fine structure map of the *uaY--oxpA* cluster. *Genetics*  
723 **100**, 185-208 (1982).
- 724 42. Z. Karacsony, A. Gacser, C. Vagvolgyi, C. Scazzocchio, Z. Hamari, A dually located  
725 multi-HMG-box protein of *Aspergillus nidulans* has a crucial role in conidial and  
726 ascospore germination. *Mol Microbiol* **94**, 383-402 (2014).
- 727 43. J. H. Yu *et al.*, Double-joint PCR: a PCR-based molecular tool for gene manipulations  
728 in filamentous fungi. *Fungal Genet Biol* **41**, 973-981 (2004).
- 729 44. C. A. Specht, C. C. DiRusso, C. P. Novotny, R. C. Ullrich, A method for extracting  
730 high-molecular-weight deoxyribonucleic acid from fungi. *Anal Biochem* **119**, 158-163  
731 (1982).
- 732 45. J. Sambrook, Fritsch, E. F., Maniatis, T., *Molecular cloning: A Laboratory Manual*. (   
733 Cold Spring Harbor Laboratory Press, Cold Spring Harbor, NY., 1989).
- 734 46. Z. Antal, L. Manczinger, L. Ferenczy, Transformation of a mycoparasitic  
735 *Trichoderma harzianum* strain with the *argB* gene of *Aspergillus nidulans*.  
736 *Biotechnology Techniques* **11**, 205-208 (1997).
- 737 47. L. Ferenczy, F. Kevei, M. Szegedi, Increased fusion frequency of *Aspergillus nidulans*  
738 protoplasts. *Experientia* **31**, 50-52 (1975).
- 739 48. F. Kevei, J. F. Peberdy, Interspecific Hybridization between *Aspergillus nidulans* and  
740 *Aspergillus rugulosus* by Fusion of Somatic Protoplasts. *Journal of General*  
741 *Microbiology* **102**, 255-262 (1977).
- 742 49. Y. Zhang, I-TASSER server for protein 3D structure prediction. *BMC Bioinformatics*  
743 **9**, 40 (2008).
- 744 50. D. Xu, Y. Zhang, Improving the physical realism and structural accuracy of protein  
745 models by a two-step atomic-level energy minimization. *Biophys J* **101**, 2525-2534  
746 (2011).

747  
748

749

750

751

752
